# Supplementary material for: Mechanistic influence of laser spot diameter on SS316L directed energy deposition revealed by in-situ plasma plume diagnostics
Source: Research Square preprint supplement (doi:10.21203/rs.3.rs-8623620/v1), 2026-01-22
Supplement: Supplementary file 1 [file 585978ceba7df5d1333ebc9a.docx]

**Appendix A**

**The supplementary data for this article includes superimposed plasma plume images captured using a CMOS camera in Fig. S1.**

**Appendix - A**

| 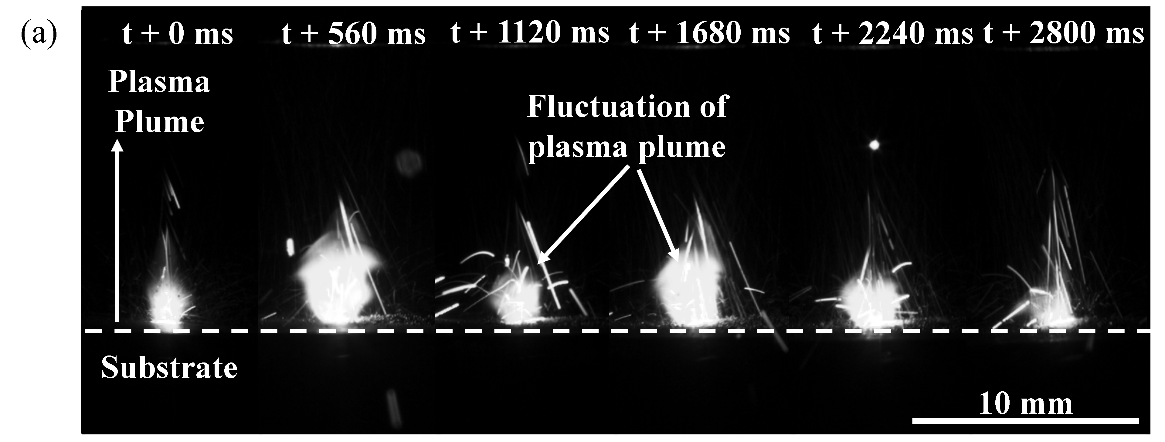 |
| --- |
| 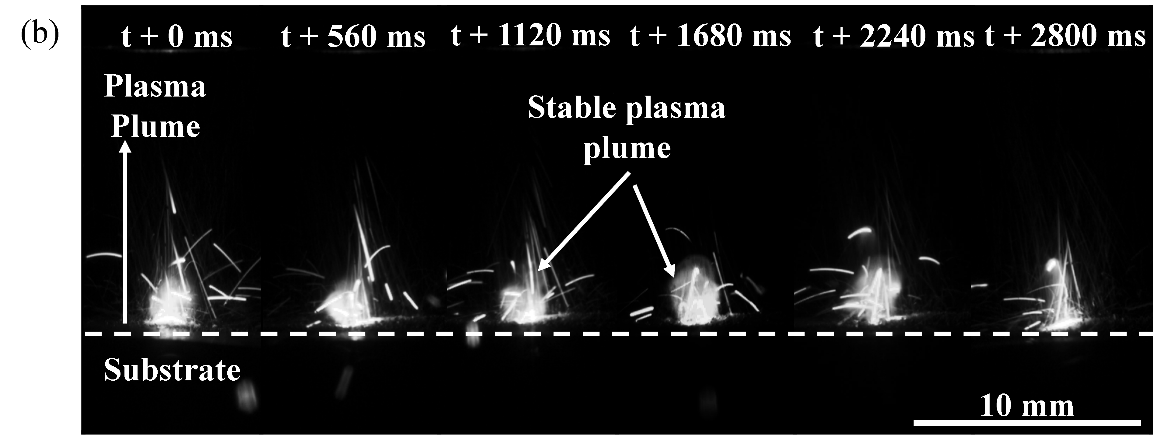 |
| 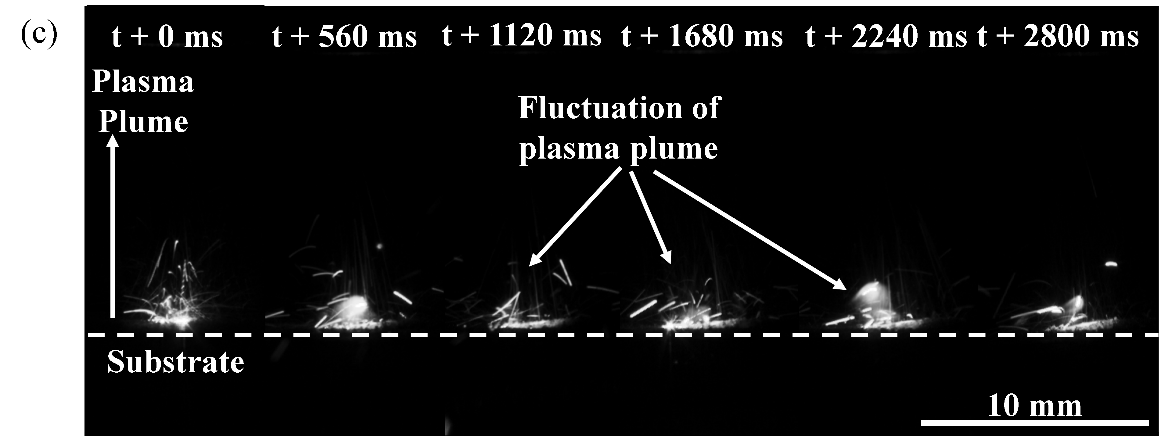 |
| 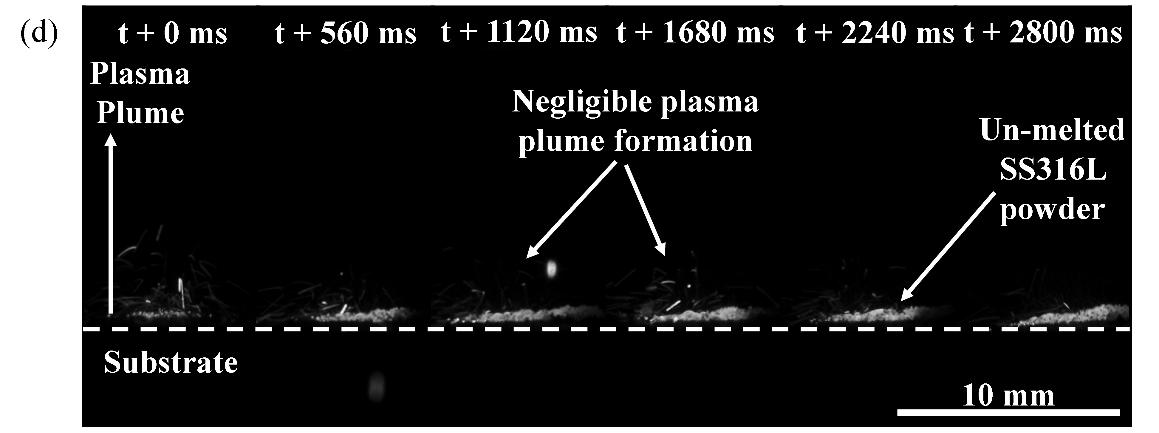 |

**Fig. S1.** Superimposed images of plasma plume SS316L clad deposition at different spot diameter (a) 0.8 mm, (b) 1.3mm, (c) 2.1mm, (d) 3.5mm.
